# Supplementary material for: Multicenter phase II trial (SWOG S1609, cohort 51) of ipilimumab and nivolumab in metastatic or unresectable angiosarcoma: a substudy of dual anti-CTLA-4 and anti-PD-1 blockade in rare tumors (DART)
Source: HighWire-hosted journal article supplement (doi:10.1136/jitc-2021-002990), 2021-08-01
Supplement: jitc-2021-002990supp002_data_supplement.pdf [file jitc-2021-002990supp002_data_supplement.pdf]

Supplemental Table

| Subject | Primary Anatomic Site | Cutaneous vs Not cutaneous | # lines of prior systemic therapy | Best Response | Duration of Response (days) |
|---------|-----------------------|----------------------------|-----------------------------------|---------------|-----------------------------|
| 1       | Stomach               | Not cutaneous              | 1                                 | PD            |                             |
| 2       | Face/Scalp            | Cutaneous                  | 1                                 | PD            |                             |
| 3       | Extremity             | Not cutaneous              | 1                                 | SD            | 446<br>(ongoing)            |
| 4       | Face/Scalp            | Cutaneous                  | 1                                 | CPR           | 386<br>(ongoing)            |
| 5       | Breast                | Cutaneous                  | 1                                 | PD            |                             |
| 6       | Extremity             | Not cutaneous              | 5                                 | PD            |                             |
| 7       | Face/Scalp            | Cutaneous                  | 3                                 | CPR           | 168                         |
| 8       | Breast                | Cutaneous                  | 0                                 | CPR           | 219                         |
| 9       | Liver                 | Not cutaneous              | 0                                 | UPR           | 240                         |
| 10      | Heart                 | Not cutaneous              | 2                                 | PD            |                             |
| 11      | Face/Scalp            | Cutaneous                  | 2                                 | CR            | 421<br>(ongoing)            |
| 12      | Breast                | Not cutaneous              | 3                                 | PD            |                             |
| 13      | Face/Scalp            | Cutaneous                  | 2                                 | NA            |                             |
| 14      | Breast                | Cutaneous                  | 4                                 | PD            |                             |
| 15      | Spleen                | Not cutaneous              | 0                                 | SD            | 249<br>(ongoing)            |
| 16      | Liver                 | Not cutaneous              | 2                                 | NA            |                             |

PD, progressive disease; SD, Stable disease; CPR, confirmed partial response; UPR, unconfirmed partial response; CR, complete response; NA, not assessed
